# Supplementary material for: Remote Automated Peritoneal Dialysis Management in Colombia
Source: PubMed Central journal article supplement — Kidney Int Rep. 2019 Mar 29;4(6):873–6. doi: 10.1016/j.ekir.2019.03.017 (PMC6551534; doi:10.1016/j.ekir.2019.03.017), 2019-03-29
Supplement: mmc2.pdf [file mmc2.pdf]

**Supplementary References**

- S1. Tokgoz B. Clinical advantages of peritoneal dialysis. *Perit Dial Int.* 2009;29(Suppl 2):S59-61.
- S2. Magnus M, Sikka N, Cherian T, et al. Satisfaction and Improvements in Peritoneal Dialysis Outcomes Associated with Telehealth. *Appl Clin Inform.* 2017;8:214-225.
- S3. Chand DH, Bednarz D. Daily remote peritoneal dialysis monitoring: an adjunct to enhance patient care. *Perit Dial Int.* 2008;28:533-537.
- S4. Dey V, Jones A, Spalding EM. Telehealth: acceptability, clinical interventions and quality of life in peritoneal dialysis. *SAGE Open Med.* 2016;4:2050312116670188.
- S5. Gallar P, Vigil A, Rodriguez I, et al. Two-year experience with telemedicine in the follow-up of patients in home peritoneal dialysis. *J Telemed Telecare.* 2007;13:288-292.
- S6. Nayak A, Karopadi A, Antony S, et al. Use of a peritoneal dialysis remote monitoring system in India. *Perit Dial Int.* 2012;32:200-204.
- S7. Tan J, Mehrotra A, Nadkarni GN, et al. Telenephrology: providing healthcare to remotely located patients with chronic kidney disease. *Am J Nephrol.* 2018;47:200-207.
- S8. Harrington DM, Myers L, Eisenman K, et al. The use of a tablet computer platform to optimize the care of patients receiving peritoneal dialysis: a pilot study. *Blood Purif.* 2014;37:311-315.
- S9. Minatodani DE, Chao PJ, Berman SJ. Home telehealth: facilitators, barriers, and impact of nurse support among high-risk dialysis patients. *Telemed J E Health.* 2013;19:573-578.
